# Supplementary material for: Detection of hydrogen peroxide and glucose with a novel fluorescent probe by the enzymatic reaction of amino functionalized MOF nanosheets
Source: Royal Society of Chemistry journal article supplement (doi:10.1039/d1ay00190f), 2021-01-01
Supplement: d1ay00190f1.pdf [file d1ay00190f1.pdf]

Supporting Information for

**Detection of Hydrogen Peroxide and Glucose with a Novel Fluorescence Probe  
by the Enzymatic Reaction of Amino Functionalized MOFs Nanosheets**

Jing Chen \*, Yali Xu, Fanghong Xu, Qian Zhang, Shuying Li

Corresponding to:

Key Lab of Bioelectrochemistry & Environmental Analysis of Gansu,

College of Chemistry and Chemical Engineering,

Northwest Normal University,

Lanzhou, 730070, P. R. China

Tel: +86-931-7975276

E-mail: jchen@nwnu.edu.cn

Supporting Figures

Supporting Tables

---

\* Corresponding author.

**Scheme S1.** O-phenylenediamine (OPD) was oxidized as 2,3-diaminophenazine (oxOPD) when Horseradish Peroxidase (HRP) and Hydrogen Peroxide (H<sub>2</sub>O<sub>2</sub>) were added.

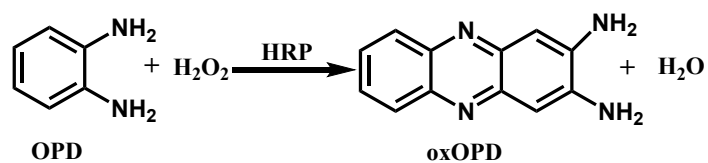

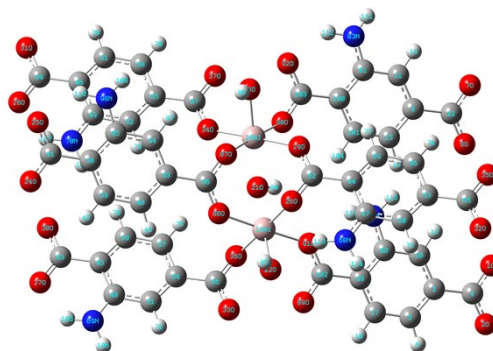

**Fig. S1A.** The partial structure of the  $\text{NH}_2\text{-MIL-53(Al)}$  nanosheets. The fragments are classified as: (1) 19,20; (2) 21-23,84-86; (3) 33,36,66; (4) 45,48,51,54,57,60,72,75,78; (5) 27,30,63; (6) 69,105,106; (7) 34,37,67; (8) 46,49,52,55,58,61,73,76,79; (9) 28,31,64; (10) 70,107,108; (11) 89,91,102; (12) 3,5,6,10,13,17,18,80,99; (13) 1,2,4; (14) 82,115,116; (15) 90,92,103; (16) 9,11,14-16,81,100,101,104; (17) 7,8,12; (18) 83,111,112; (19) 87,88,96; (20) 38-40,42,43,93-95,97; (21) 24,25,41; (22) 98,109,110; (23) 26,29,62; (24) 44,47,50,53,56,59,71,74,77; (25) 32,35,65; (26) 68,113,114.

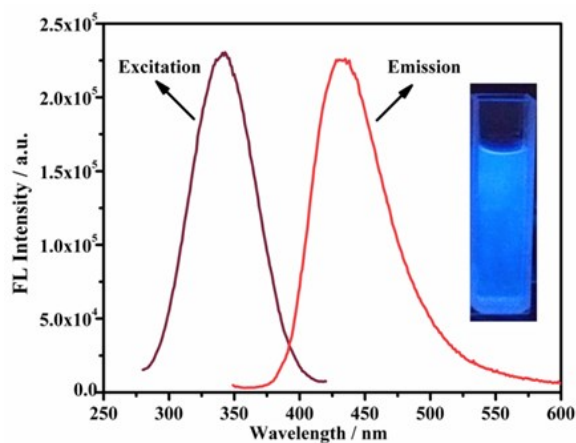

**Fig. S1B.** The fluorescence emission (red), and excitation spectra (purple) of the nanosheets. Inset shows the color of the nanosheets solution under 365 nm UV light.

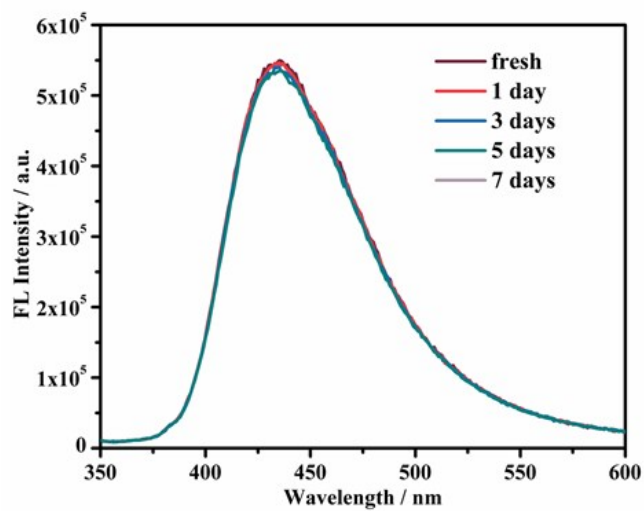

**Fig. S2.** The fluorescence emission spectra ( $\lambda_{\text{ex}}=339$  nm) of the NH<sub>2</sub>-MIL-53(Al) nanosheets at the different time.

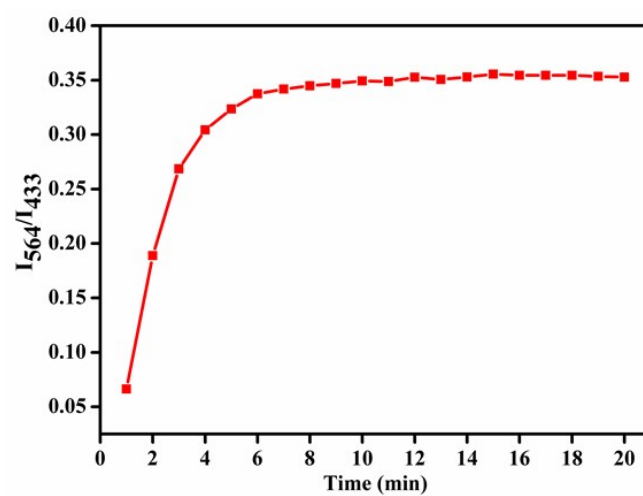

**Fig. S3.** The fluorescence emission intensity of  $\text{NH}_2\text{-MIL-53(Al)}$  nanosheets at different time (0-20 min) for detecting  $\text{H}_2\text{O}_2$  ( $\lambda_{\text{ex}}=339$  nm).

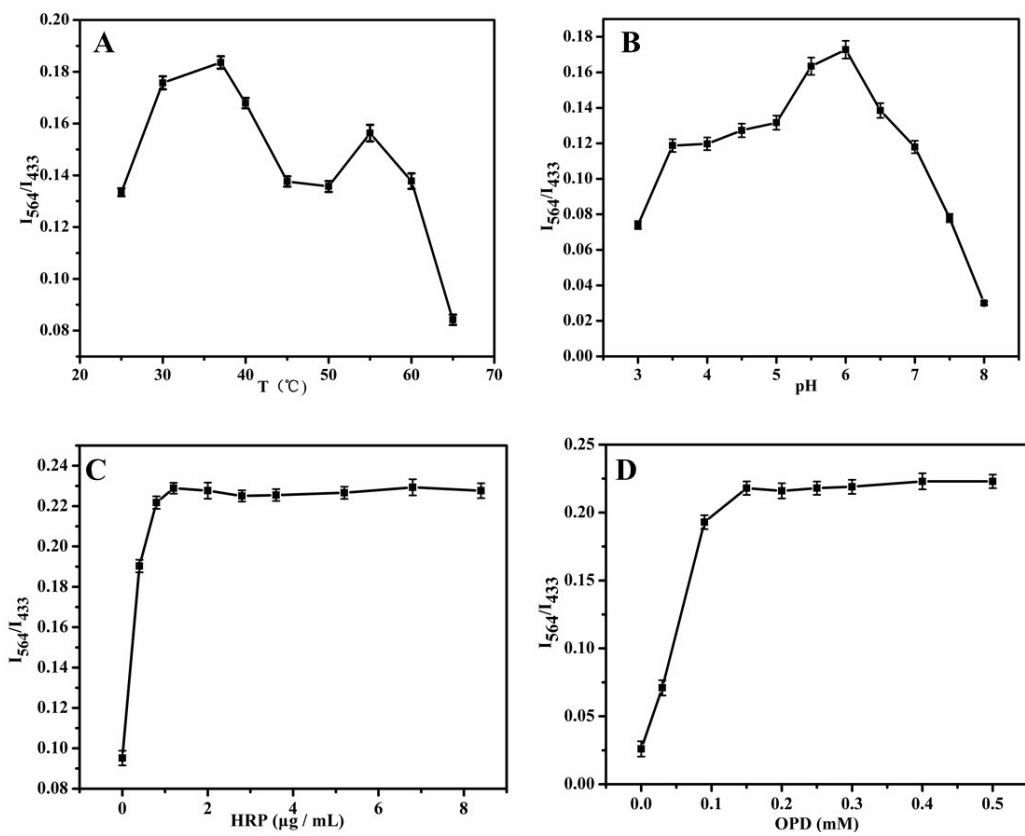

**Fig. S4.** The optimization of the experimental conditions during the detection process.  $\text{NH}_2\text{-MIL-53(A)}$  nanosheets ( $5\mu\text{g}/\text{mL}$ ). (A) Temperature, (B) pH, (C) HRP, (D) OPD.

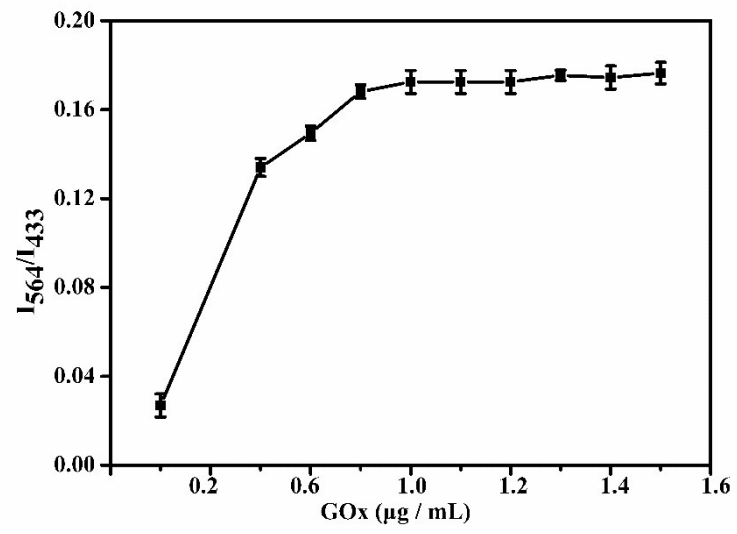

**Fig. S5.** The optimization of the glucose concentration.

**Table S1.** This method was compared to other reported glucose detection methods.

| Fluoresceng probes              | Linear range ( $\mu\text{M}$ ) | LOD ( $\mu\text{M}$ ) | Ref.      |
|---------------------------------|--------------------------------|-----------------------|-----------|
| g-C <sub>3</sub> N <sub>4</sub> | 0.099-36.5                     | 0.4                   | 1         |
| Obaph and pHAQB                 | 0.08-420                       | 11                    | 2         |
| UCNPs                           | 7-340                          | 2.3                   | 3         |
| Mn <sup>2+</sup> doped-CdTe/ZnS | 0.0001-10                      | 1.1                   | 4         |
| GOQD                            | 2.5-7.5                        | 0.65                  | 5         |
| CdTe/ZnTe/ZnS                   | 0.4-20                         | 50                    | 6         |
| Carbon Quantum Dots             | 0.01-0.15                      | 3.5                   | 7         |
| NH <sub>2</sub> -MIL-53(Al)     |                                |                       |           |
| ratiometric probe               | 4-40                           | 0.041                 | This work |



## References

- [1] J.W. Liu, Y. Luo, Y.M. Wang, L.Y. Duan, J.H. Jiang, R.Q. Yu, Graphitic carbon nitride nanosheets-based ratiometric fluorescent probe for highly sensitive detection of H<sub>2</sub>O<sub>2</sub> and glucose, *ACS Appl. Mater. Interfaces* 8 (2016) 33439-33445.
- [2] K. Wannajuk, M. Jamkatoke, T. Tuntulani, B. Tomapatanaget, Highly specific-glucose fluorescence sensing based on boronic anthraquinone derivatives via the GOx enzymatic reaction, *Tetrahedron* 68 (2012) 8899-8904.
- [3] H. Chen, A. Fang, L. He, Y. Zhang, S. Yao, Sensitive fluorescent detection of H<sub>2</sub>O<sub>2</sub> and glucose in human serum based on inner filter effect of squaric acid-iron(III) on the fluorescence of upconversion nanoparticle, *Talanta* 164 (2016) 580-587.
- [4] S.K. Vaishnav, J. Korram, R. Nagwanshi, K.K. Ghosh, M.L. Satnami, Mn<sup>2+</sup> doped-CdTe/ZnS modified fluorescence nanosensor for detection of glucose, *Sensor Actuat B-Chem.* 245 (2017) 196-204.
- [5] W. Na, H. Liu, M. Wang, X. Su, A boronic acid based glucose assay based on the suppression of the inner filter effect of gold nanoparticles on the orange fluorescence of graphene oxide quantum dots, *Microchim. Acta* 184 (2017) 1463-1470.
- [6] W.T. Wu, T. Zhou, A. Berliner, P. Banerjee, S.Q. Zhou, Glucose-mediated assembly of phenylboronic acid modified CdTe/ZnTe/ZnS quantum dots for intracellular glucose probing, *Angew. Chem. Int. Edit.* 49 (2010) 6554-6558.
- [7] D.H. He, C.B. Zheng, Q. Wang, C.L. He, Y.I. Lee, L. Wu, X.D. Hou, Dielectric barrier discharge-assisted one-pot synthesis of carbon quantum dots as fluorescent probes for selective and sensitive detection of hydrogen peroxide and glucose, *Talanta* 142 (2015) 51-56.
